# Supplementary material for: Rapid reprogramming of epigenetic and transcriptional profiles in mammalian culture systems
Source: PubMed Central journal article supplement (PMC4334405; doi:10.1186/s13059-014-0576-y), 2015-02-04
Supplement: 13059_2014_576_MOESM1_ESM.pdf [file 13059_2014_576_MOESM1_ESM.pdf]

## Supplementary Figures and Tables legends

### **Supplementary Figure S1. Proliferation of stimulated naïve CD4<sup>+</sup> T-cells in culture.**

(a) Histograms showing the proportions of naïve CD4<sup>+</sup> T-cells that have undergone cell division 1, 3 and 5 days after stimulation with anti-CD28 and anti-CD3 as determined by carboxyfluorescein diacetate succinimidyl ester (CFSE) incorporation. The percentage of cells that have undergone at least one cell division at each time-point is shown in blue. Red-dotted line represents the CFSE profile at day one. (b) Bargraph showing the proportion of cells in S1/G2M phase 0, 3 and 5 days after stimulation after stimulation with anti-CD28 and anti-CD3 as determined by propidium iodide staining. (c) Dot-blot of a serial dilution of genomic DNA from primary MEF tissue and primary naïve CD4<sup>+</sup> T-cells with an antibody specific to 5hmC. Methylene blue was used to control for loading. Control DNAs were unmodified (C), methylated (5mC) and hydroxymethylated (5hmC), respectively.

### **Supplementary Figure S2: Mouse embryonic fibroblasts retain their cellular identity in culture.**

(a) Bargraph illustrating the relative expression (arbitrary units) of two MEF-specific genes (*Lhx6* & *Lrrc15*) in 96 different mouse tissues and cell lines, identified by bioinformatics meta-analysis of published gene expression data (GEO ID: GSE1133). MEF expression is shown in red. Dotted line indicates the median expression level across all 96 tissues. (b) Heatmap illustrating the expression level of all 23 MEF-specific genes in all eight biological samples ( $N_{CULTURE} = 4$ ;  $N_{TISSUE} = 4$ ). (c) Fluorescence microscopy images of MEFs during adaptation to culture stained with an antibody against *Arid5b* (*Arid5b*, green). The DNA was counterstained with DAPI (blue). The merged DAPI & *Arid5* image is shown on right.

### **Supplementary Figure S3. MeDIP-chip can detect small locus-specific, allele-specific changes in DNA methylation.**

(a) Promoter hypermethylation of the CpG-rich promoter of the gene *Mageh1* on the inactive X chromosome in female MEF tissue is readily detected by MeDIP-chip. Schematic representation of the 5mC profile of the promoter is shown; the figure is adapted from the UCSC Genome Browser. CpG Islands are shown in green. (b) Loss of methylation at the promoter of the *Xist* gene on the active X chromosome is clearly detected by MeDIP-chip. Schematic representation of the 5mC profile of the promoter is shown; the figure is adapted from the UCSC Genome Browser. (c) Reduced 5mC (left panel) and 5hmC (right panel) levels were observed across the female X chromosome (red dots)

suggesting genome-wide hypomethylation of the inactive X chromosome in female cells. Each data point represents the median 5mC- and 5hmC-enrichment levels as determined by MeDIP- and hMeDIP-chip in non-overlapping 2 Mb windows of the mouse genome (chromosome 14 – 19 and X).

**Supplementary Figure S4. Adaptation to cell culture remodels the 5hmC profile of mouse embryonic fibroblasts.** Unsupervised hierarchical clustering grouped the 5mC samples by sex, reflecting 5mC differences on the X chromosome between samples. The 5hmC profiles clustered samples by sample type (tissue v culture) reflecting the dramatic culture-induced remodelling of the 5hmC profile during adaptation to culture. Clustering was performed using the ‘hclust’ function in the R programming language; a distance matrix was computed for each data set using Euclidean distance, subsequently samples were clustered using *Ward's* minimum variance agglomeration method.

**Supplementary Figure S5. Loss of 5hmC was highly conserved between biological replicates.** (a) 5mC patterns are highly conserved between biological replicates (2 male (♂) and 2 female (♀)) of embryonic tissue and all 4 biological replicates upon adaptation (2 male (♂) and 2 female (♀)) to culture. A schematic representation of the 5mC profile of a 40 Mb autosomal region is shown; the figure is adapted from the UCSC Genome Browser. Annotated RefSeq transcripts are shown in red. Tissue profiles in blue and culture profiles in black. (b) 5hmC patterns are highly conserved between biological replicates of primary embryonic tissue and show clear regions of enrichment associated with transcript density. This pattern is lost in all 4 biological replicates (2 male (♂) and 2 female (♀)) upon adaptation to culture. A schematic representation of the 5hmC profile of a 40 Mb autosomal region (chromosome 14) is shown; the figure is adapted from the UCSC Genome Browser. Annotated RefSeq transcripts are shown in red. Tissue profiles in blue and culture profiles in black.

**Supplementary Figure S6. The distribution of 5hmC peaks of enrichment are altered in MEFs after culture.** (a) Significantly less 5hmC peak probes were detected in DNA from cultured samples. Bargraph (right panel) showing a reduction of 5hmC peak probes in DNA from cultured samples (Mann-Whitney U-test,  $P < 0.01$ ). No reduction in peak probe number was observed for 5mC (left panel). Peak probes were defined as any five consecutive probes in which a minimum of four probes had an enrichment score above the 90<sup>th</sup> percentile. Tissue

samples are yellow and cultured samples are in purple. **(b)** Diagram illustrating the defined genomic regions that are assayed for percentage (%) 5hmC enrichment (top panel); Promoter, TSS, exon, intron, down-stream and inter-genic. On the left panel the 5mC and 5hmC distribution of all defined regions is shown. The distribution of 5hmC peaks is altered in MEFs after culture over intronic and intergenic regions. On the right panel the 5mC and 5hmC distribution of all genic regions is shown; that is intergenic and intronic probes have been excluded. Here, 5mC showed a small, but significant (Mann-Whitney U-test,  $P < 0.05$ ) enrichment in promoter peaks in culture. 5hmC distribution over promoters and exons are also different between tissue and cultured MEF samples, showing a relative increase and decrease at promoters and exonic regions, respectively. Peak probes were defined as any five consecutive probes in which a minimum of four probes had an enrichment score above the 90<sup>th</sup> percentile.

**Supplementary Figure S7. Loss of 5hmC from gene bodies in cultured MEFs is highly consistent across replicates.** Schematic representation of 5hmC content across the gene body of two genes, *Vwa2* and *Klf5*, is shown for all biological replicates. 2 male (♂) and 2 female (♀) for tissue (blue profile) and cultured (black profile) MEFs. The gene organisation for *Vwa2* and *Klf5* is shown above.

**Supplementary Figure S8. Agglomerative methylation in cultured MEFs of CpG island promoters across the *Hoxc* (4-13) locus.** **(a)** Schematic representation of the 5mC profile across the *Hoxc* locus, showing gain of 5mC at several CpG island promoters upon adaptation of MEFs to culture. The figure is adapted from the UCSC Genome Browser. Annotated RefSeq transcripts are shown in light blue. **(b)** Bisulfite sequencing of selected *Hoxc* gene promoters in MEFs before and after culture. Filled circles (black) represent 5mCpG and open circles represent CpG. The overall amount of 5mCpG as a percentage of total CpG in each amplicon is shown under each image.

**Supplementary Figure S9. Validation of hMeDIP enrichment profiles by GLIB (glucosylation, periodate oxidation, biotinylation).** **(a)** Locus-specific GLIB-PCR of five candidate loci which gained (*Hoxc4*, *Hoxc5*), lost (*Vwa2*, *1700054A03*), and retained (*Gnas*) 5hmC in culture. Tissue is in blue and cultured samples in orange. **(b)** The same candidate loci as assayed by locus-specific hMeDIP-PCR. Tissue is in blue and cultured samples in orange. The values for A and B are an average of four biological replicates,  $\pm$  SD. \*  $P < 0.05$ ,

Mann-Whitney U-test. (c) A schematic representation of 5hmC enrichment across chromosome 17 by hMeDIP-chip (blue), and GLIB seq (purple) of primary MEFs (From *Neri et al*, 2013: Short Read Archive: SRX244234). (d) A schematic representation of 5hmC enrichment across the H19 locus (indicated by red bar) by hMeDIP-chip (blue), and GLIB seq (purple) (From *Neri et al*, 2013: Short Read Archive: SRX244234).

**Supplementary Figure S10: hMeDIP-Seq confirms the rapid redistribution of 5hmC during adaptation of MEFs to culture.** (a) A minimum of 30 million hMeDIP-Seq reads for each sample were uniquely mapped to the mouse genome (mm10) using the bowtie short read aligner. (b) hMeDIP-Seq coverage was normalised to total read count per sample (reads per million, RPM). The genomic profiles obtained by hMeDIP-Seq closely replicated those obtained by hMeDIP-chip, including (c) loss of 5hmC from gene bodies and (d) maintenance of 5hmC at the *H19* locus. (e & f) Gains of 5hmC were observed across all four *Hox* loci. The *Hoxc* (e) and *Hoxb* (f) loci are shown. Figures are adapted from the Integrated Genome Viewer [63].

**Supplementary Figure S11: Genome-wide redistribution of 5hmC and 5mC in CD4<sup>+</sup> T-cells in culture replicates that observed in MEFs.** (a) Clear patterning of 5hmC is lost upon adaptation of MEFs to culture. A schematic representation of the 5hmC profiles over a 40 Mb section of chromosome 14; adapted from the UCSC Genome Browser (for comparison with Figure 2h). Refseq transcripts (transcript) mapped to the region are also shown. (b) Bar chart showing six-fold fewer 5hmC-enriched peaks were detected in DNA from cultured samples than uncultured naïve T-cells (top panel). Bar chart showing the distribution of 5hmC peaks in genic (gene-body or promoter) and non-genic regions in non-cultured (NT) and cultured cells (Th1) CD4<sup>+</sup> T-cells. The distribution of 5hmC peaks is altered in CD4<sup>+</sup> T-cells after culture, showing a small shift towards inter-genic regions. 5hmC peaks were determined using MACS peak-finding software. Genic compartments were defined as shown in Figure S6b. (c) Histogram of the distribution of changes in gene body 5hmC coverage in cultured and uncultured CD4<sup>+</sup> T-cells. A marked loss of 5hmC is evident and similar to that observed in MEFs. (d) Histogram of the distribution of changes in promoter 5hmC coverage in cultured and uncultured CD4<sup>+</sup> T-cells. (e) Histogram of the distribution of changes in gene body 5mC coverage in cultured and uncultured CD4<sup>+</sup> T-cells. (f) Histogram of the distribution of changes in promoter 5mC coverage in cultured and uncultured CD4<sup>+</sup> T-cells.

Large changes in promoter 5mC (2-fold) in cultured are skewed towards gains, as seen in MEFs. Data was downloaded from the Gene Expression Omnibus (GEO: GSE59212)

**Supplementary Figure S12: hMeDIP-qPCR confirms the generality of 5hmC redistribution during adaptation of different cell types to culture.** (a) Bar chart of hMeDIP-qPCR showing changes in 5hmC content at six loci (3 gaining 5hmC in culture, 3 losing 5hmC in culture) in cultured MEFs. Each bar represents a single biological replicate. Error bars represent the standard deviation of multiple technical replicates. (b) Bar chart of hMeDIP-qPCR showing changes in 5hmC at the same six loci in cultured CD4<sup>+</sup> T-cells in the presence and absence of 1000 uM Vitamin C. Note that the scale and direction of change at each locus in MEFs and CD4<sup>+</sup> T-cells is highly similar, and Vitamin C addition results in partial-to-full rescue of 5hmC at each locus. Each bar represents a single biological replicate. Error bars represent the standard deviation of multiple technical replicates. (c & d) Bar chart of MeDIP-qPCR showing changes in 5mC at the same six loci in cultured MEFs (c) and CD4<sup>+</sup> T cells (d). Each bar represents a single biological replicate. Error bars represent the standard deviation of multiple technical replicates.

**Supplemental Table S1. MEF-specific genes**

**Supplemental Table S2. Genomic features that are present on tiling microarrays.**

**Supplemental Table S3. Quantitative PCR (qPCR) primers.**

**Supplemental Table S4. GO terms associated with promoters gaining 5mC in culture**

# Supplementary Figure S1 (Meehan)

## a. CSFE

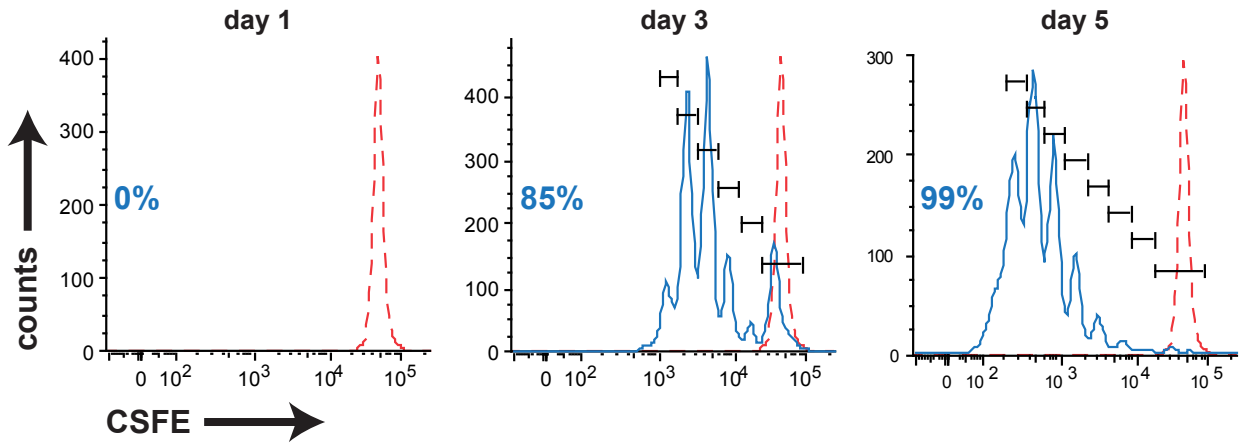

## b. propidium iodide

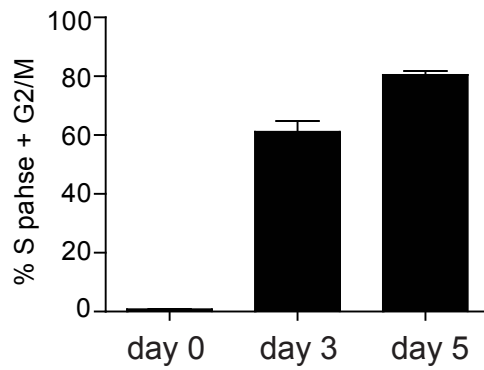

## c.

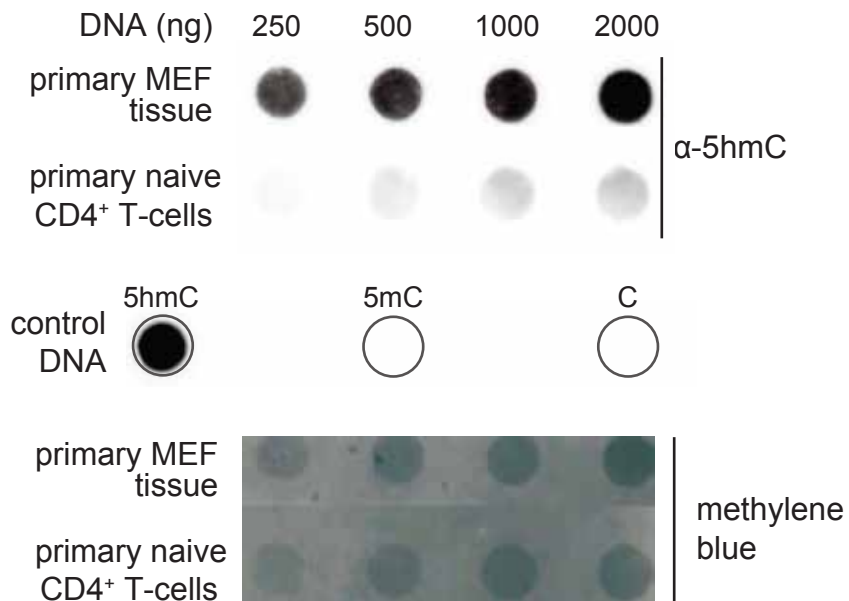

# Supplementary Figure S2

**a**

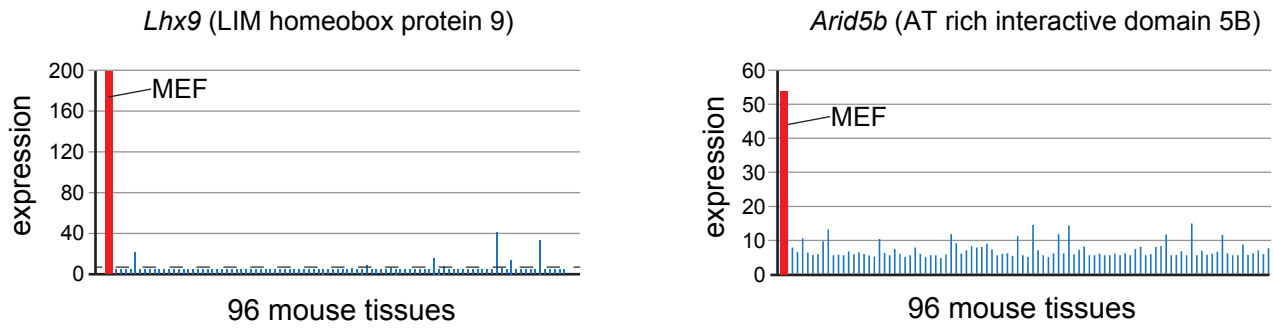

**b**

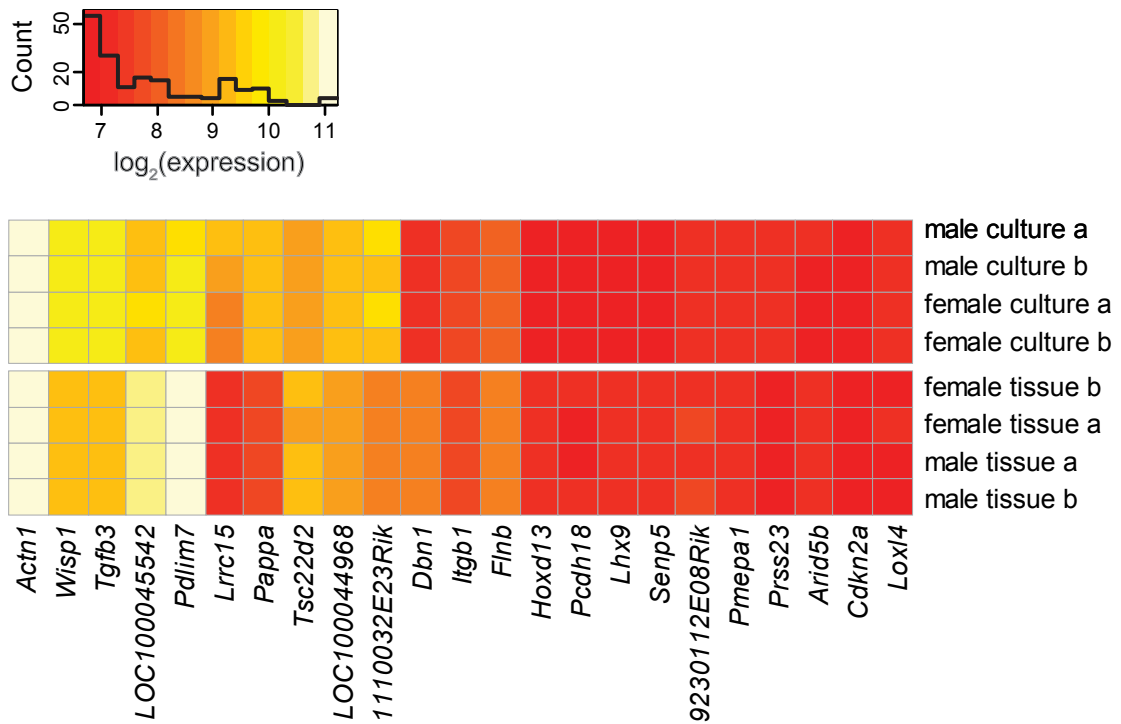

**c**

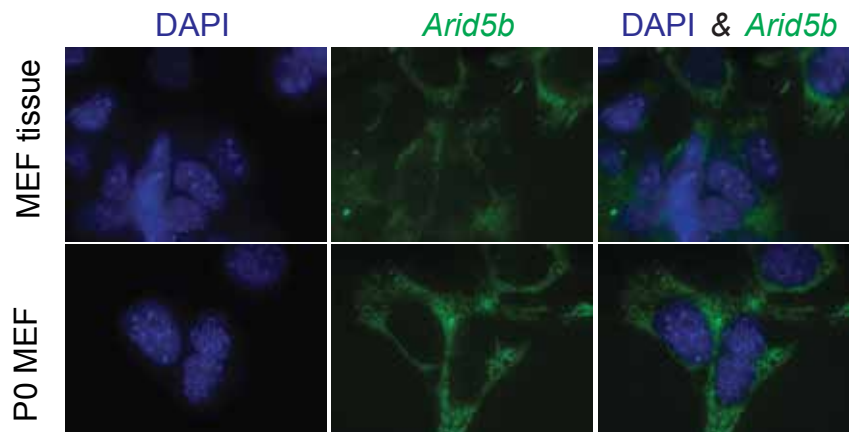

# Supplementary Figure S3 (Meehan)

## a. 5mC

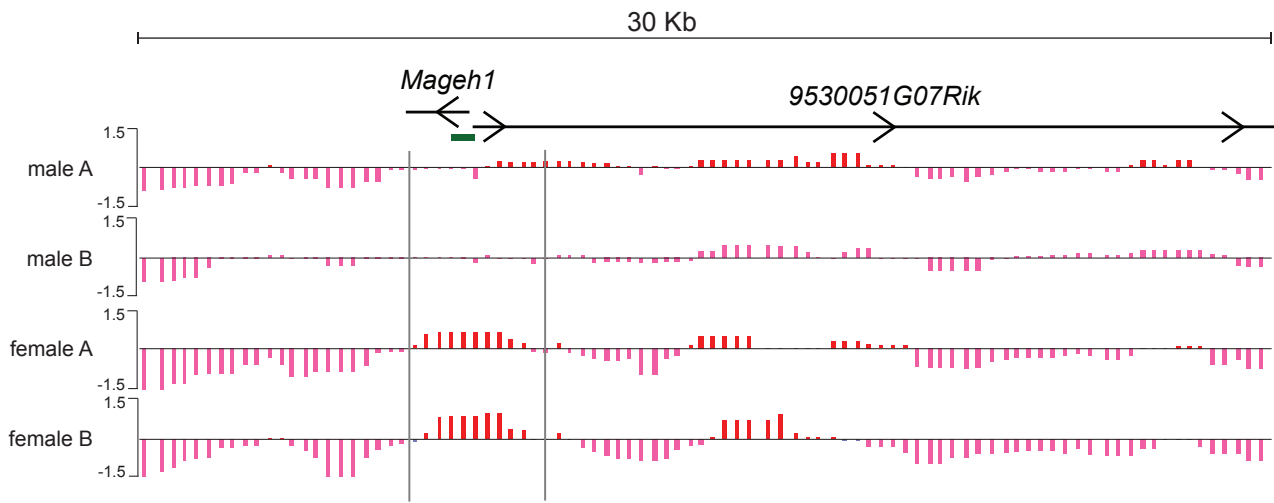

## b. 5mC

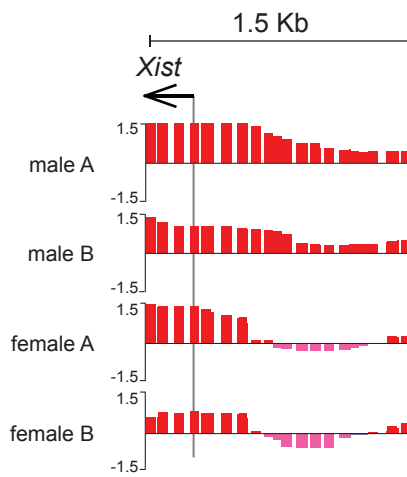

## c.

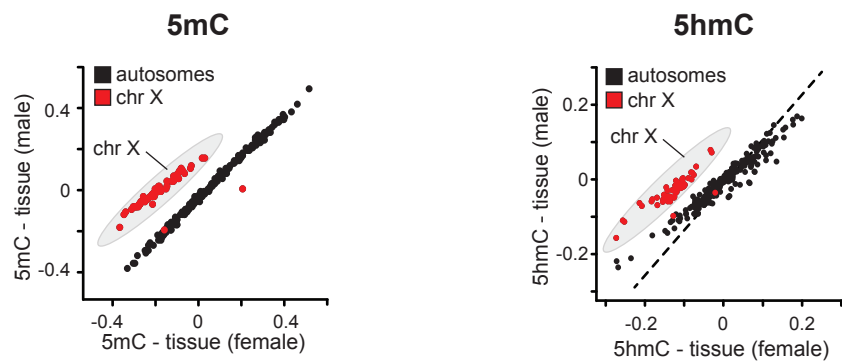



Supplementary Figure S4 (Meehan)

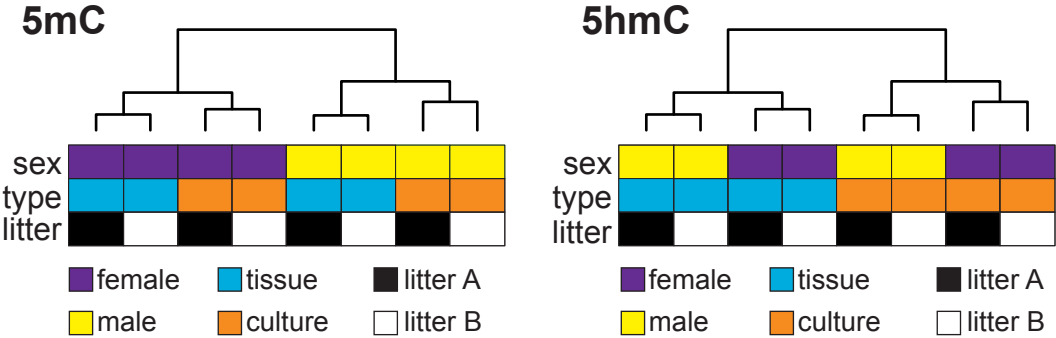

Supplementary Figure S5 (Meehan)

**A. 5-hydroxymethylcytosine**

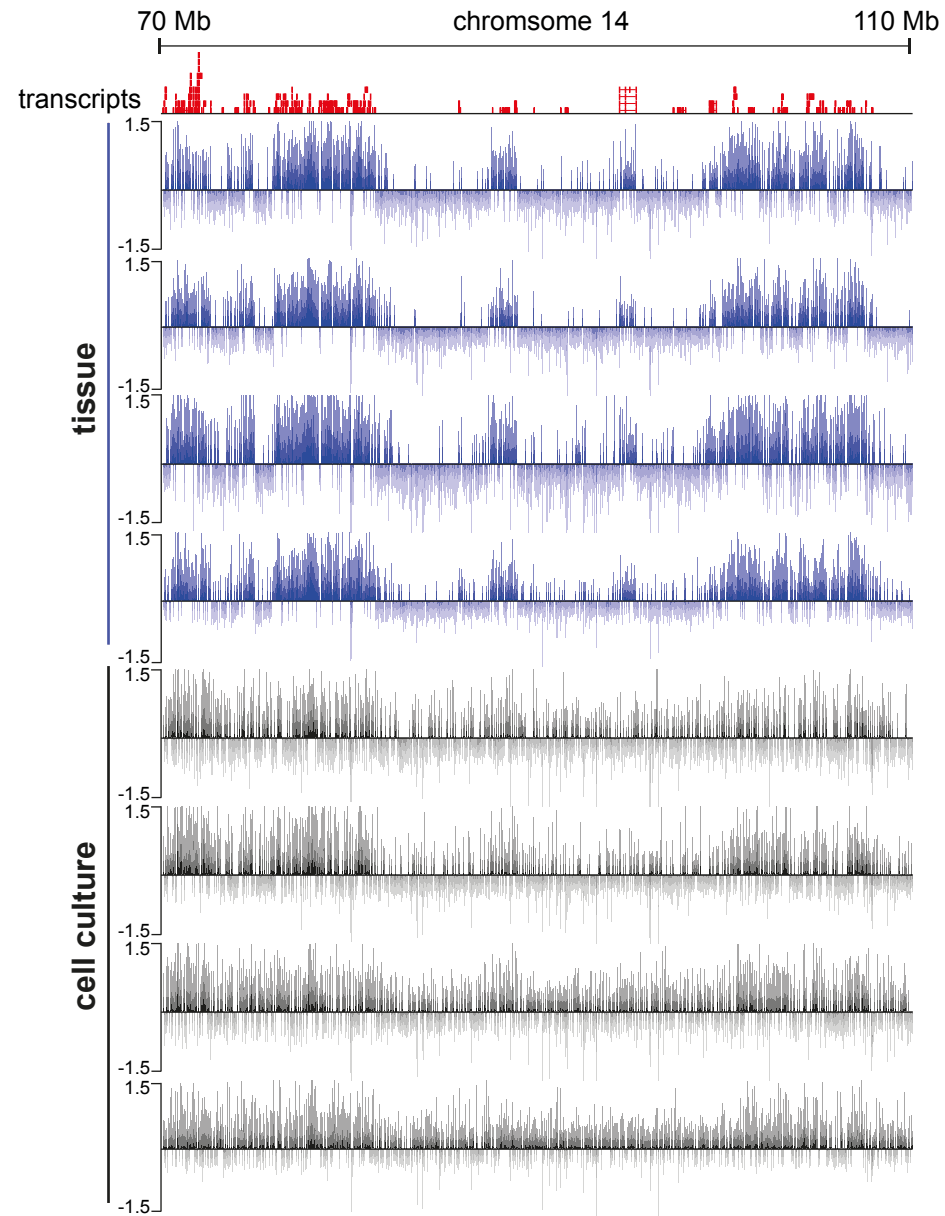

**B. 5-methylcytosine**

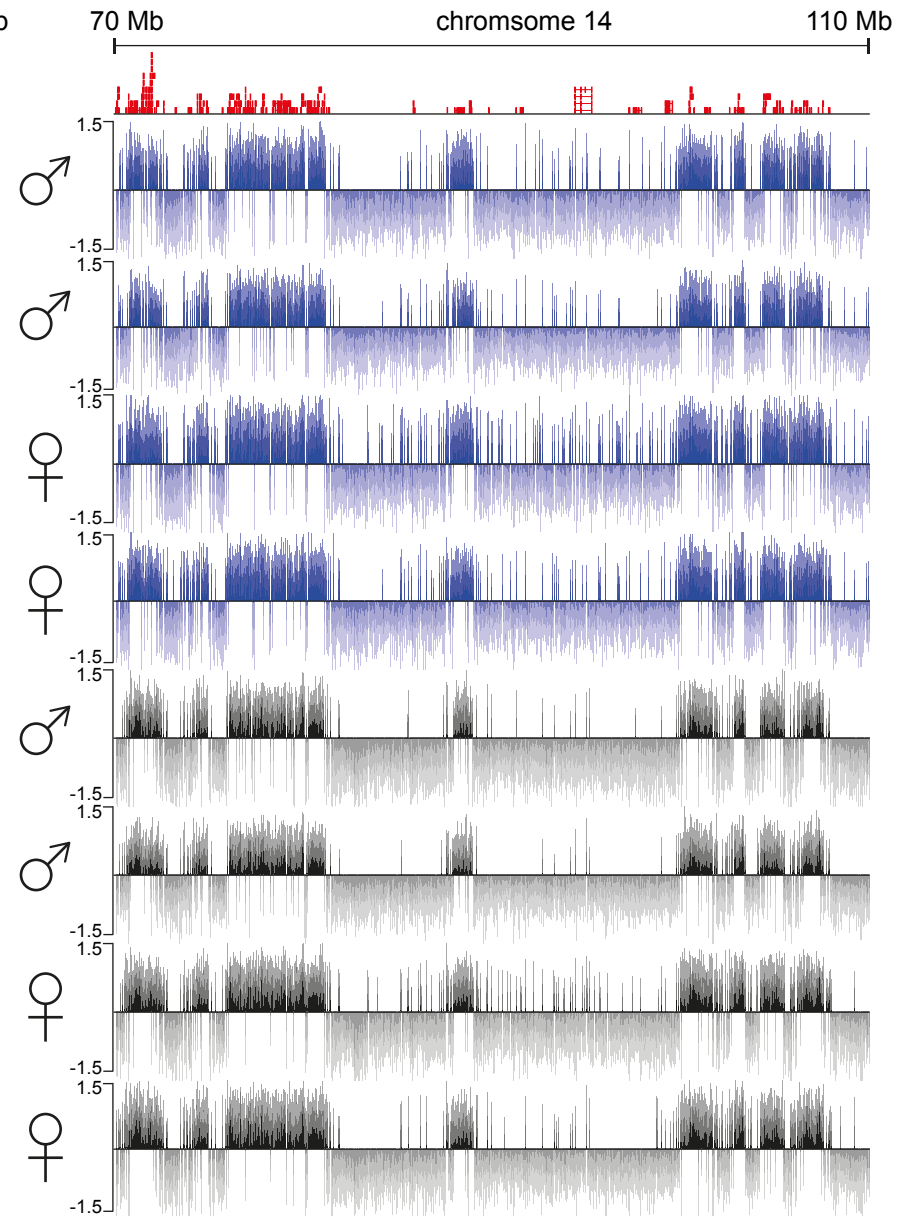

## Supplementary Figure S6 (Meehan)

a.

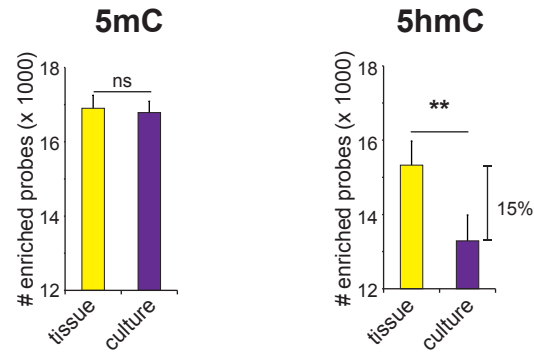

b.

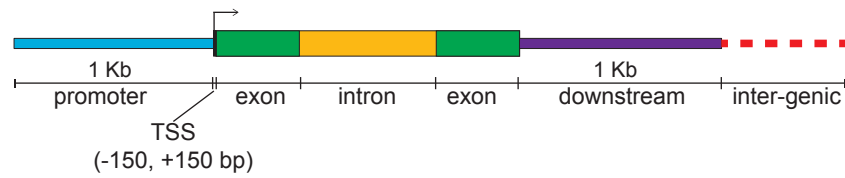

**all probes**

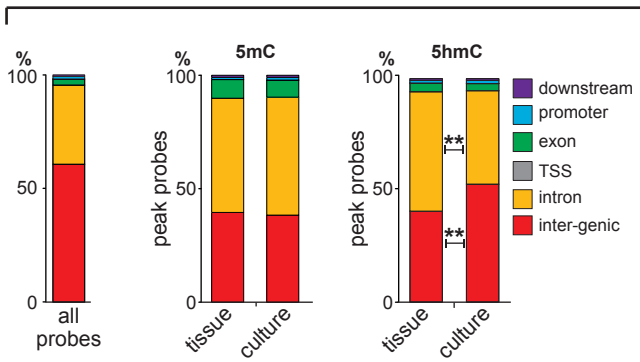

**genic probes only**

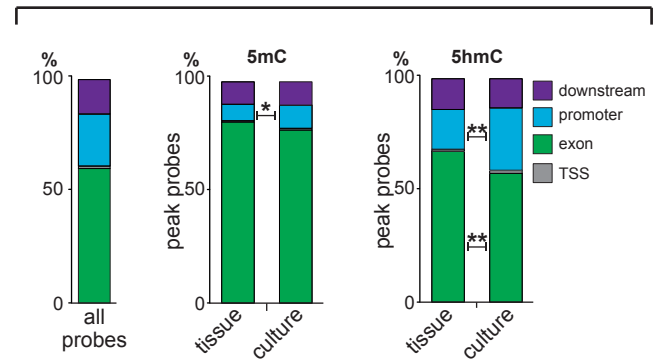

## Supplementary Figure S7 (*Meehan*)

### A. 5-hydroxymethylcytosine

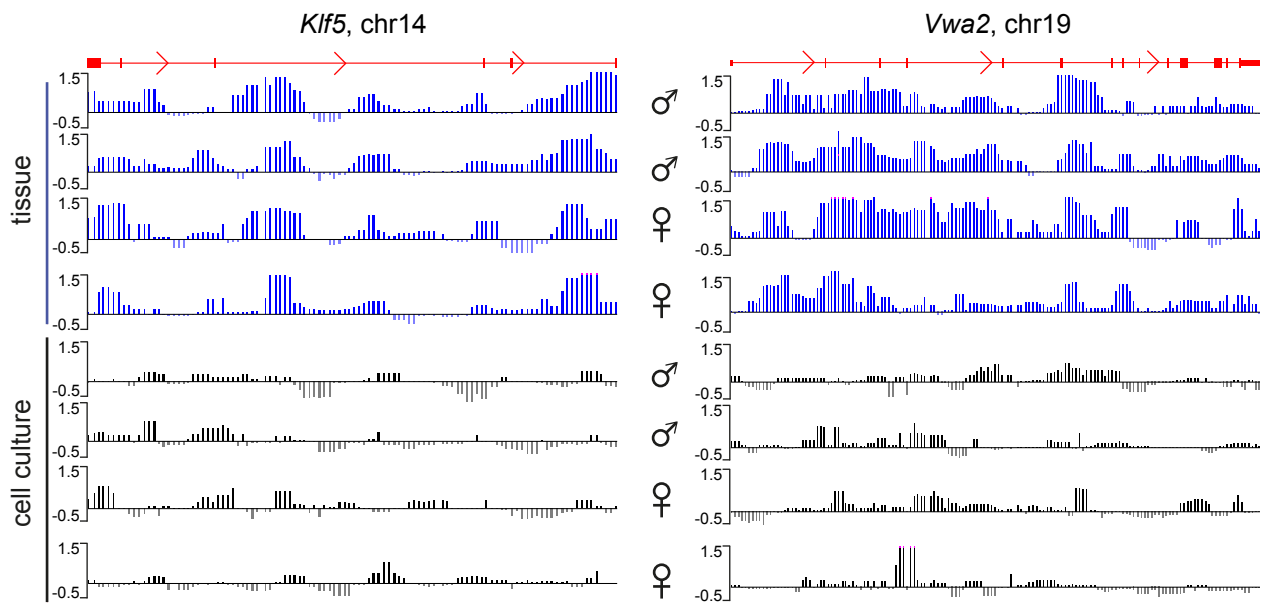

# Supplementary Figure S8 (Meehan)

**a.**

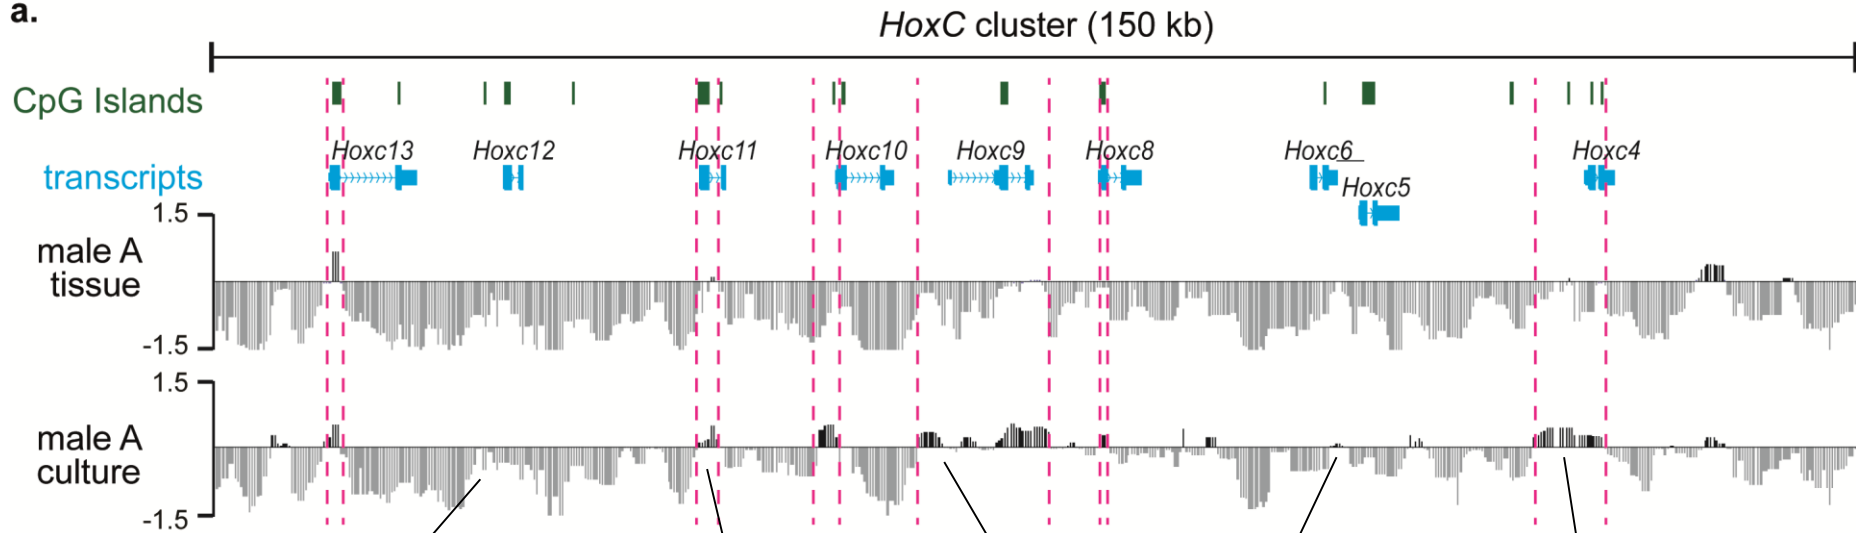

**b.**

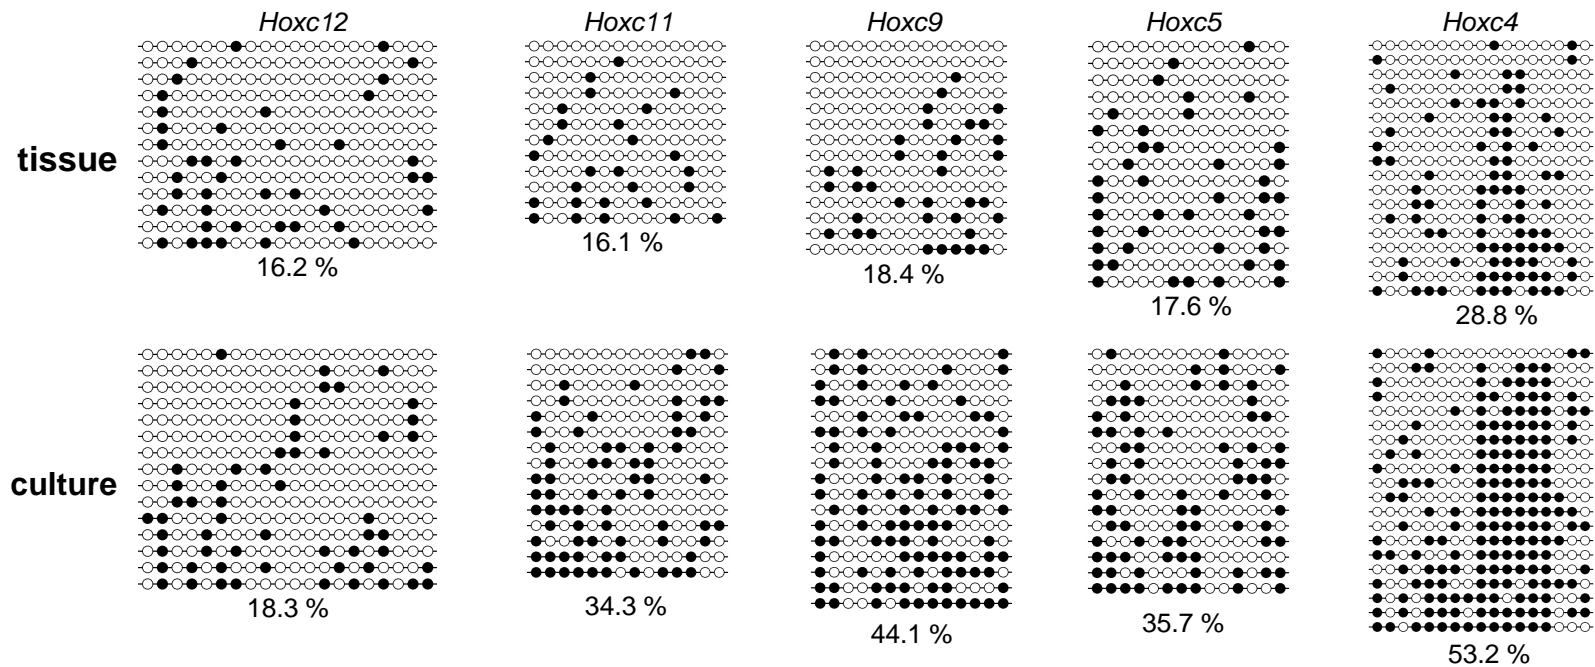

## Supplementary Figure S9 (Meehan)

### A. GLIB-PCR

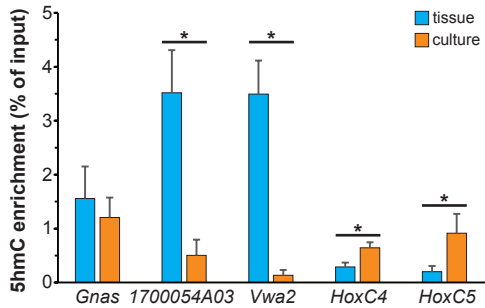

### B. hmeDIP-PCR

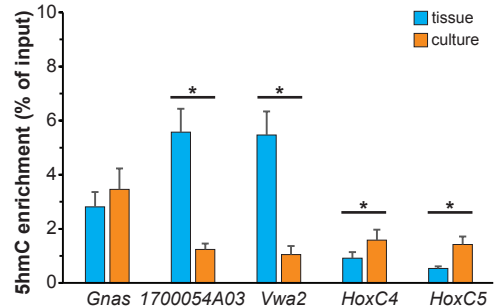

### C. hmeDIP-chip v GLIB-seq

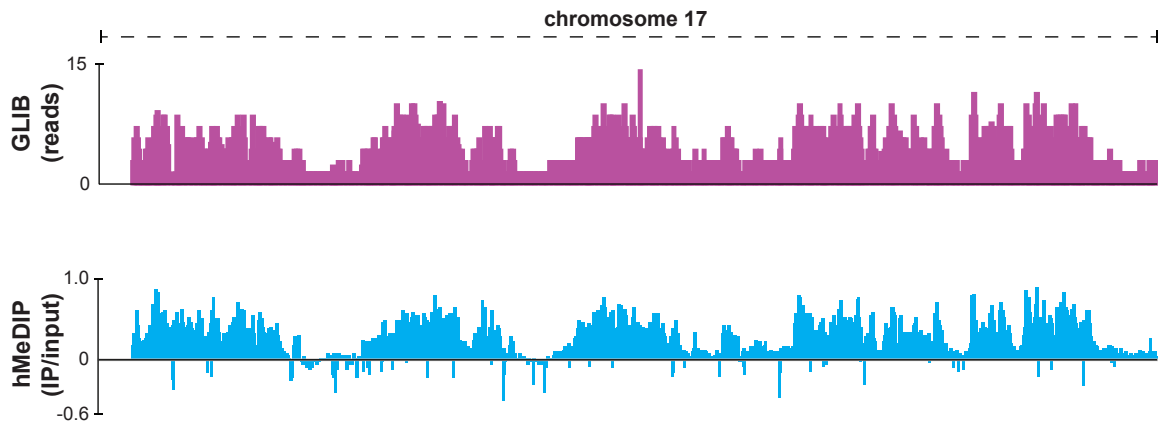

### D. hmeDIP-chip v GLIB-seq at *H19* locus

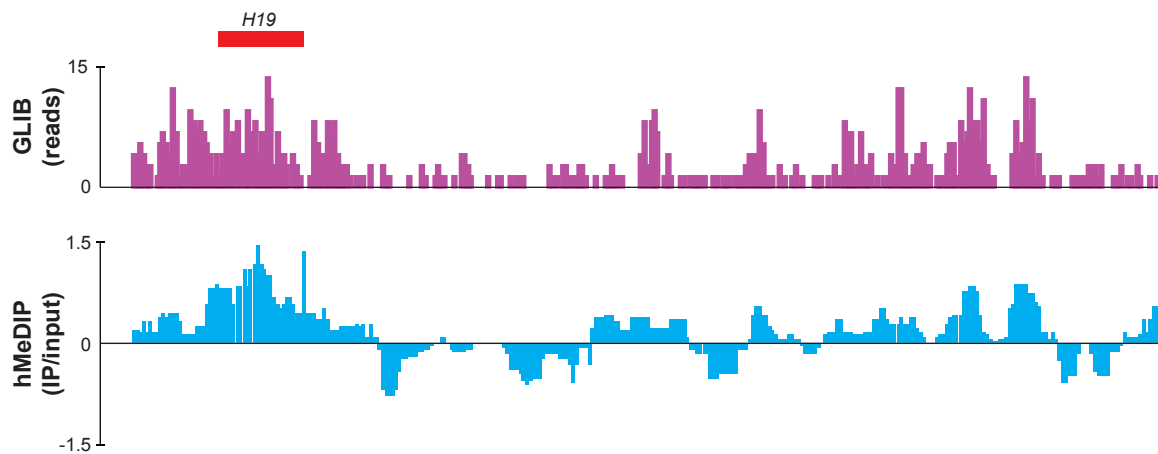

# Supplementary Figure 10 (Meehan)

## a. hMeDIP-Seq

# uniquely mapped reads per sample (single end)

|       | tissue     | culture    |
|-------|------------|------------|
| input | 60,383,385 | 70,180,026 |
| IP    | 30,066,313 | 57,412,306 |

## b. hMeDIP-Seq v hMEDIP-chip

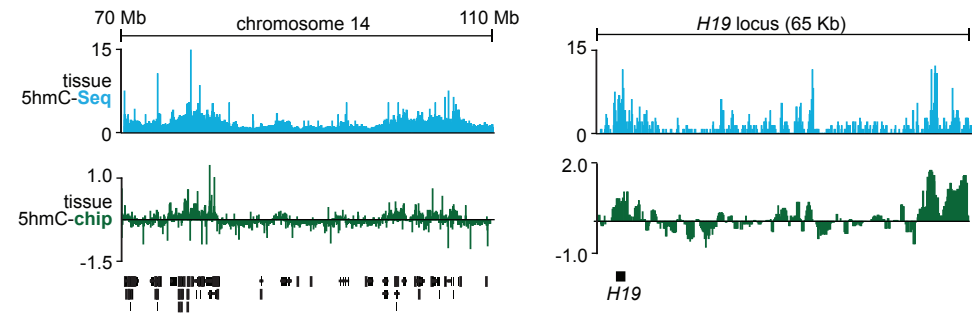

## c. *Vwa2*

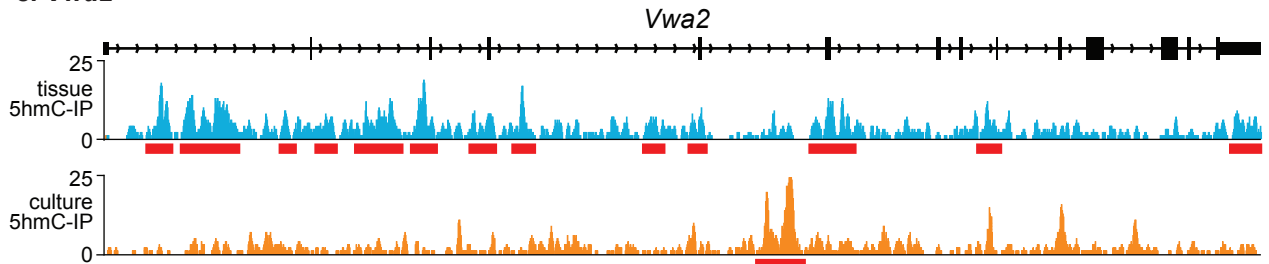

## d. *H19* locus

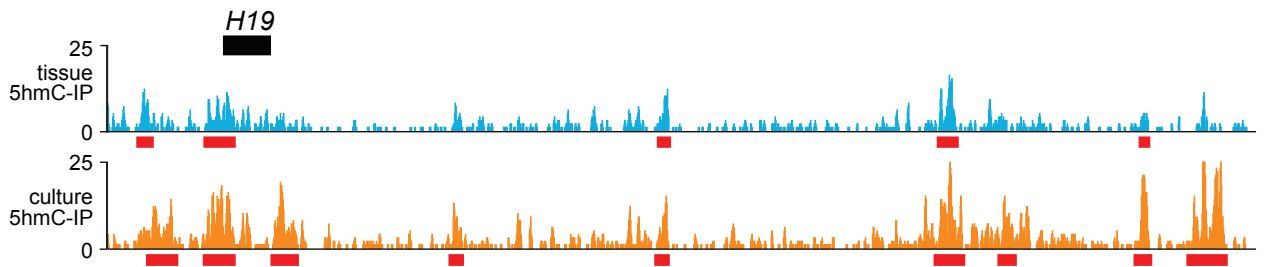

## e. *Hoxc* cluster

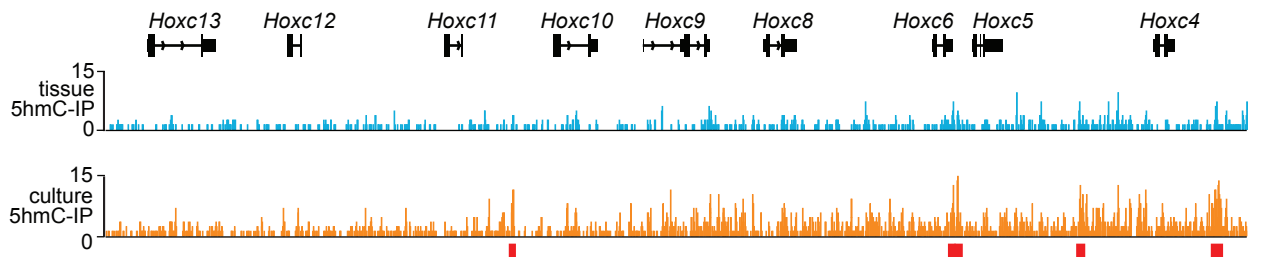

## f. *Hoxb* cluster

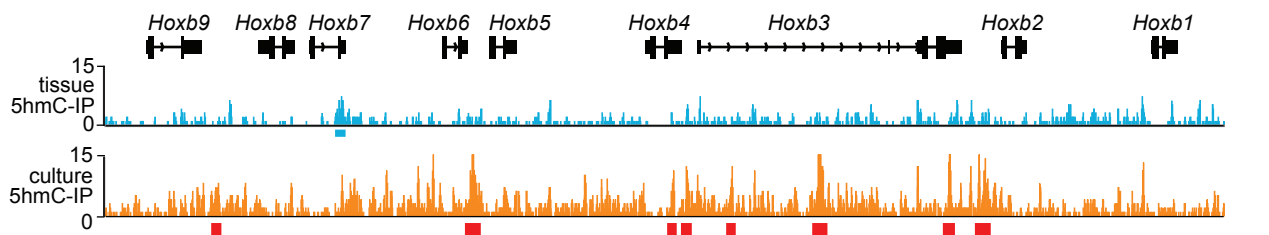

# Supplementary Figure S11 (Meehan)

**a. 5hmC - CD4+ T cells**

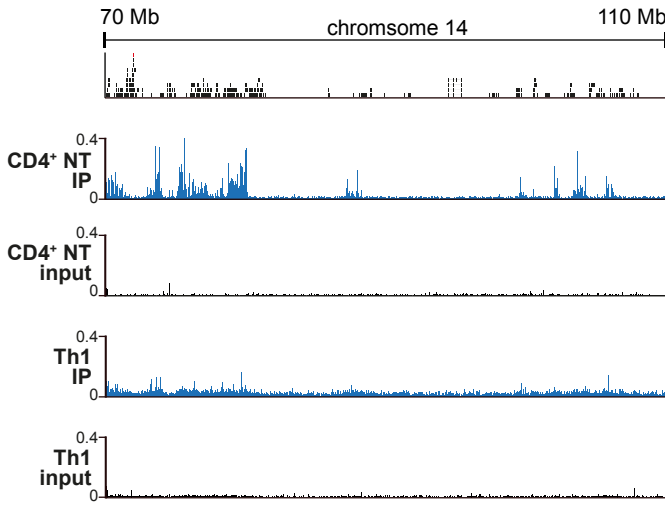

**b. 5hmC peaks**

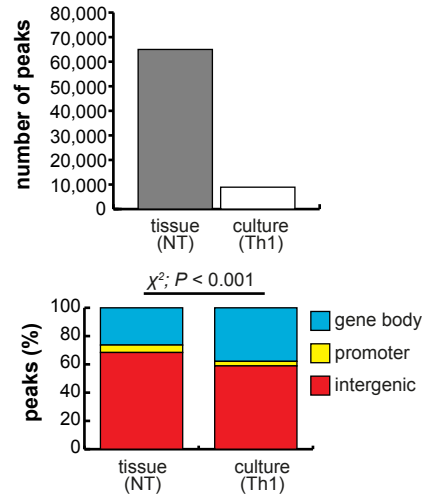

**c. 5hmC - gene body**

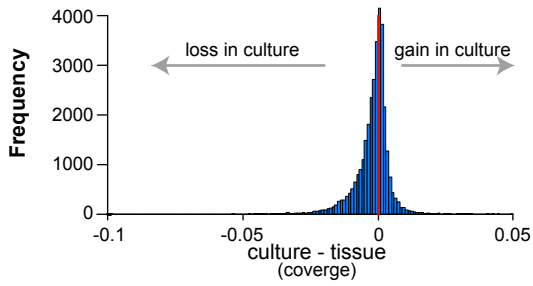

**d. 5hmC - promoter**

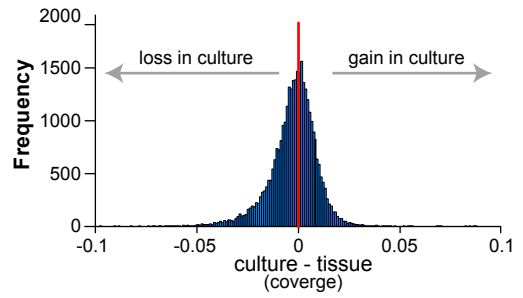

**e. 5mC - gene body**

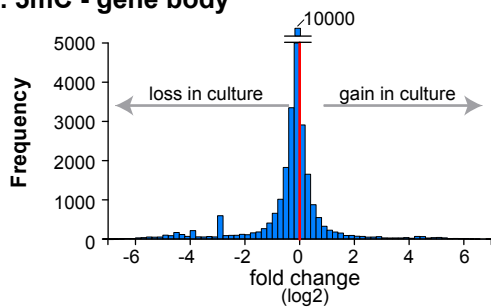

**f. 5mC - promoter**

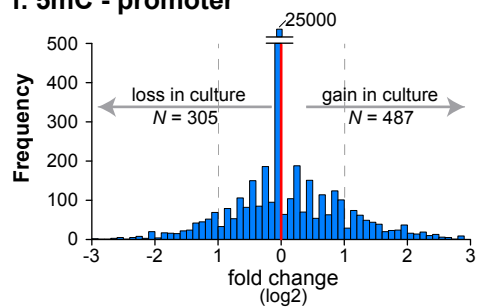



## Supplementary Figure S12 (Meehan)

**a. 5hmC**

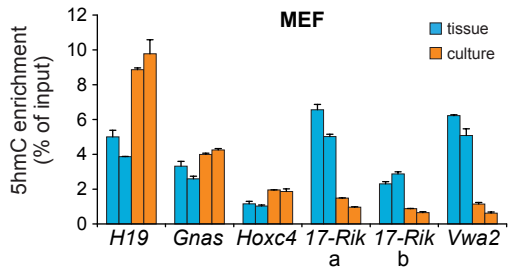

**c. 5mC**

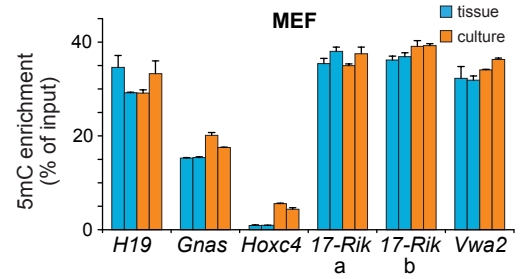

**b. 5hmC**

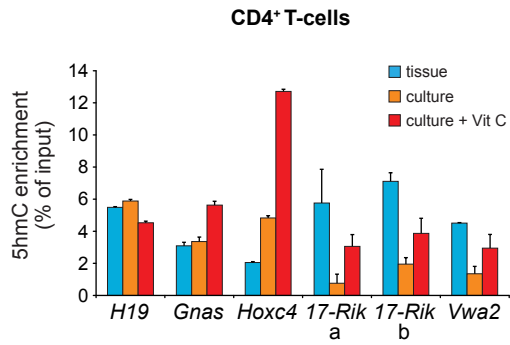

**d. 5mC**

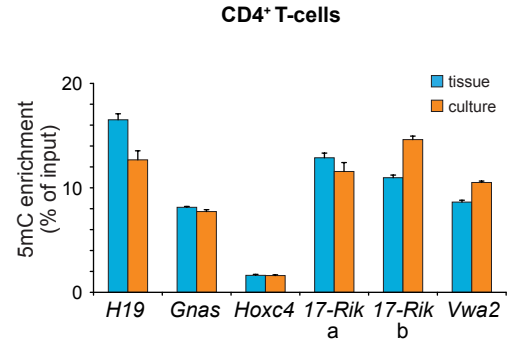

**Supplemental Table S1. MEF-specific genes**

| <b>Gene Symbol</b>   | <b>Affy Probe ID</b> | <b>Gene Description</b>                                                              |
|----------------------|----------------------|--------------------------------------------------------------------------------------|
| <i>9230112E08Rik</i> | 1444156_at           | RIKEN cDNA 9230112E08 gene                                                           |
| <i>Actn1</i>         | 1452415_at           | actinin, alpha 1                                                                     |
| <i>Arid5b</i>        | 1420972_at           | AT rich interactive domain 5B (MRF1-like)                                            |
| <i>Cdkn2a</i>        | 1450140_a_at         | cyclin-dependent kinase inhibitor 2A                                                 |
| <i>Dbn1</i>          | 1451734_a_at         | drebrin 1                                                                            |
| <i>1110032E23Rik</i> | 1429637_at           | RIKEN cDNA 1110032E23 gene                                                           |
| <i>Flnb</i>          | 1426750_at           | filamin, beta                                                                        |
| <i>Hoxd13</i>        | 1422239_at           | homeo box D13                                                                        |
| <i>Itgb1</i>         | 1426920_x_at         | integrin beta 1 (fibronectin receptor beta)                                          |
| <i>Lhx9</i>          | 1429905_at           | LIM homeobox protein 9                                                               |
| <i>LOC100044968</i>  | 1420972_at           | similar to modulator recognition factor 2; AT rich interactive domain 5B (MRF1-like) |
| <i>LOC100045542</i>  | 1452280_at           | FERM, RhoGEF (Arhgef) and pleckstrin domain protein 1 (chondrocyte-derived);         |
| <i>Loxl</i>          | 1436063_at           | lysyl oxidase-like 1                                                                 |
| <i>Lrrc15</i>        | 1453214_at           | leucine rich repeat containing 15                                                    |
| <i>Pappa</i>         | 1432592_at           | pregnancy-associated plasma protein A                                                |
| <i>Pcdh18</i>        | 1422889_at           | protocadherin 18                                                                     |
| <i>Pdlim7</i>        | 1443785_x_at         | PDZ and LIM domain 7                                                                 |
| <i>Pmepa1</i>        | 1452295_at           | prostate transmembrane protein, androgen induced 1                                   |
| <i>Prss23</i>        | 1446560_at           | protease, serine, 23                                                                 |
| <i>Senp5</i>         | 1440904_at           | SUMO/sentrin specific peptidase 5                                                    |
| <i>Tgfb3</i>         | 1417455_at           | transforming growth factor, beta 3                                                   |
| <i>Tsc22d2</i>       | 1453012_at           | TSC22 domain family, member 2                                                        |
| <i>Wisp1</i>         | 1448593_at           | WNT1 inducible signaling pathway protein 1                                           |

**Supplemental Table S2. Genomic features present on tiling microarrays**

| chr   | size (Mb) | transcripts | genes | CpG islands | genic (Mb) | non-genic (Mb) |
|-------|-----------|-------------|-------|-------------|------------|----------------|
| 14    | 107.6     | 266         | 206   | 240         | 16.4       | 91.2           |
| 15    | 100.5     | 1130        | 856   | 985         | 36.6       | 63.9           |
| 16    | 95.3      | 956         | 713   | 640         | 33.1       | 62.2           |
| 17    | 92.3      | 1492        | 1127  | 1114        | 36.3       | 56.0           |
| 18    | 87.8      | 722         | 558   | 699         | 38.2       | 49.6           |
| 19    | 58.3      | 974         | 749   | 787         | 26.6       | 31.7           |
| X     | 163.6     | 1251        | 974   | 514         | 41.8       | 121.8          |
| Y     | 2.9       | 22          | 21    | 9           | 1.1        | 1.8            |
| Total | 708.3     | 6813        | 5204  | 4988        | 230.1      | 478.2          |

**Supplemental Table S3. Quantitative PCR (qPCR) primer**

| <b>target name</b>                            | <b>forward primer (5' → 3')</b> | <b>reverse primer (5' → 3')</b> | <b>Length (bp)</b> |
|-----------------------------------------------|---------------------------------|---------------------------------|--------------------|
| <i>Hoxc4</i> Promoter                         | CATCGATCCGAAATTTCTC             | TACAGCTCCTGGTGGTGATG            | 123                |
| <i>Hoxc5</i> Promoter                         | CGGCTTCCATCACTAACCTC            | ATGCGCTCTTCCCAAATAAG            | 104                |
| <i>Hoxc8</i> Promoter                         | CCTATTACGACTGCCGGTTC            | CGTGGTGAAGAAGTCTTGG             | 123                |
| <i>Hoxc9</i> Promoter                         | TCAGTCTGGGCTCCAAAGTC            | AGAGGTAGCCTCCCCAGAAC            | 130                |
| <i>Hoxc11</i> Promoter                        | GGCAGGAGAAGAGAACGATG            | TGGGCAGATAGAGGTTGGAG            | 123                |
| <i>Hoxc12</i> Promoter                        | AAATCTGTTCTGCCTTTTCG            | TCTACTCACGTGGGCGCTAC            | 137                |
| <i>Hoxc13</i> Promoter                        | AGACCCAGGCTTAGCATCAC            | TAAGAAATCCGGCGACTCC             | 93                 |
| <i>170054A03Rik</i>                           | TTGATCAGGTTTCCCAAAGC            | TCTCTGCCTTTGTTTCTCTGG           | 119                |
| <i>170054A03Rik</i><br>1 <sup>st</sup> intron | GGCTCAGCCTGATTCCAC              | CAGTCGGTCGAAATCTAAAGG           | 112                |
| <i>170054A03Rik</i><br>2 <sup>nd</sup> intron | GACTCTGGTTGTCCGATTCC            | TAGCACAATGGAGCAAGCAC            | 112                |
| <i>Igsf5</i> promoter                         | ATGTCACAGGATCCCAGTCC            | TGCTAGGTGGTCAGGGAAAG            | 118                |
| <i>Klf5</i> intron                            | CCTTGGTAAATCGTCGTTGC            | TGAAGCCACTGGTGAAACTG            | 115                |
| <i>Lrrc30</i> 5' UTR                          | TGCCTCAGTTGTGCTTTTTG            | GCTGCACATTTCCATAATC             | 107                |
| <i>Lrrc30</i> 1 <sup>st</sup> exon            | AGCTGGGATAGGCAGTTGTG            | AGAGCCTCAAGGTCTGTTC             | 115                |
| <i>Vwa2</i> 1 <sup>st</sup> intron            | GGAAGCCTTACGCTGTTATCC           | CTTAAGCTGGGCAGGAACTG            | 114                |
| <i>Vwa2</i> 1 <sup>st</sup> intron            | CTGGGCCTGAGCAAGATATAG           | AGCCAATGTGAGAACAGGAAG           | 125                |
| <i>Vwa2</i> C 1 <sup>st</sup> intron          | GTCTCCCTTTTCCCGAACTC            | GACACAGCAAGGAACAAAAGC           | 124                |
| <i>H19</i> genic                              | CCAGCAGCTCCCCTTTATC             | GGAAAACATCGGAGTGAAGC            | 126                |
| <i>H19</i> genic/promoter                     | AGAATTCCCGCCCCTACTC             | GGAGTTGTGGTGAGGCTGTC            | 157                |
| <i>H19</i> inter-genic A                      | CGGACACCTCCAATTTGGTC            | CAACCACCACAAGGTGACAG            | 90                 |
| <i>H19</i> inter-genic B                      | TCACTTCCATCCACCATGC             | GTGTGAAGCCTGCAAAAAG             | 128                |
| <i>Gnas</i> downstream                        | AGGATGGAGGCTCAATATGC            | GATAGCATGTCACCGGACTG            | 101                |

**Supplemental Table S4. GO terms associated with promoters gaining 5mC in culture.****Cluster 1, enrichment score: 1.6**

| <b>GO terms</b>                      | <b># genes</b> | <b>unadjusted <i>P</i>-value</b> |
|--------------------------------------|----------------|----------------------------------|
| pattern specification process        | 10             | 0.01                             |
| regionalization                      | 8              | 0.03                             |
| anterior/posterior pattern formation | 7              | 0.04                             |

**Cluster 2, enrichment score: 1.26**

| <b>GO terms</b>                      | <b># genes</b> | <b>unadjusted <i>P</i>-value</b> |
|--------------------------------------|----------------|----------------------------------|
| muscle organ development             | 8              | 0.01                             |
| muscle cell development              | 4              | 0.01                             |
| striated muscle cell development     | 3              | 0.06                             |
| muscle fiber development             | 3              | 0.06                             |
| striated muscle cell differentiation | 4              | 0.06                             |
| muscle tissue development            | 5              | 0.08                             |
| muscle cell differentiation          | 4              | 0.13                             |
| striated muscle tissue development   | 4              | 0.16                             |
| cardiac muscle tissue development    | 3              | 0.21                             |

**Cluster 3, enrichment score: 1.24**

| <b>GO terms</b>               | <b># genes</b> | <b>unadjusted <i>P</i>-value</b> |
|-------------------------------|----------------|----------------------------------|
| gut morphogenesis             | 3              | 0.04                             |
| digestive tract morphogenesis | 3              | 0.06                             |
| digestive system development  | 3              | 0.06                             |
| gut development               | 3              | 0.09                             |

**Cluster 4, enrichment score: 1.16**

| <b>GO terms</b>                               | <b># genes</b> | <b>unadjusted <i>P</i>-value</b> |
|-----------------------------------------------|----------------|----------------------------------|
| genitalia development                         | 4              | 0.01                             |
| sex differentiation                           | 6              | 0.03                             |
| reproductive developmental process            | 7              | 0.12                             |
| urogenital system development                 | 4              | 0.25                             |
| development of primary sexual characteristics | 3              | 0.41                             |
